# Supplementary material for: Observations and source investigations of the boundary layer bromine monoxide (BrO) in the Ny-Ålesund Arctic
Source: Copernicus journal article supplement (doi:10.5194/acp-18-9789-2018), 2018-07-11

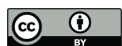

*Supplement of*

## **Observations and source investigations of the boundary layer bromine monoxide (BrO) in the Ny-Ålesund Arctic**

**Yuhan Luo et al.**

*Correspondence to:* Yuhan Luo (yhluo@aiofm.ac.cn) and Fuqi Si (sifuqi@aiofm.ac.cn)

The copyright of individual parts of the supplement might differ from the CC BY 4.0 License.

**Fig S1. Ensemble back trajectory calculations of air masses arriving at Ny-Alesund from 22 April 00:00 UTC to 30 April 00:00 UTC at sea level. Each trajectory runs 72 hours.**

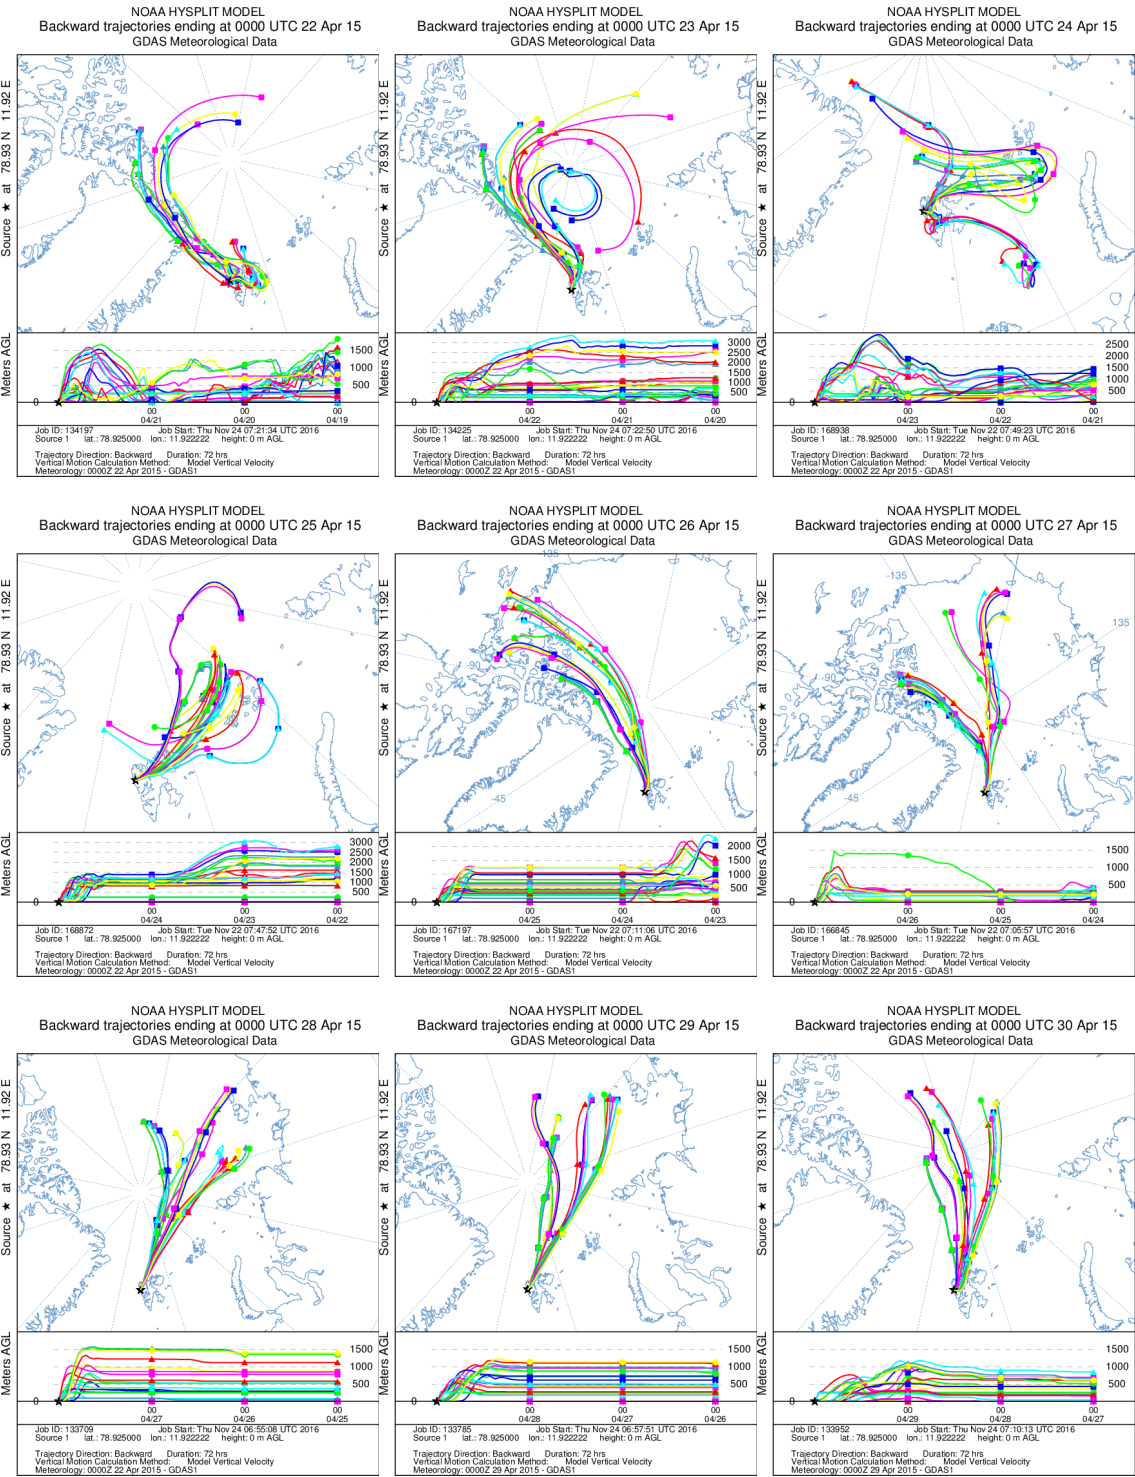

**Fig S2. Ensemble back trajectory calculations of air masses arriving at Ny-Alesund from 22 April 00:00 UTC to 30 April 00:00 UTC at 500 meters a.s.l. Each trajectory runs 72 hours.**

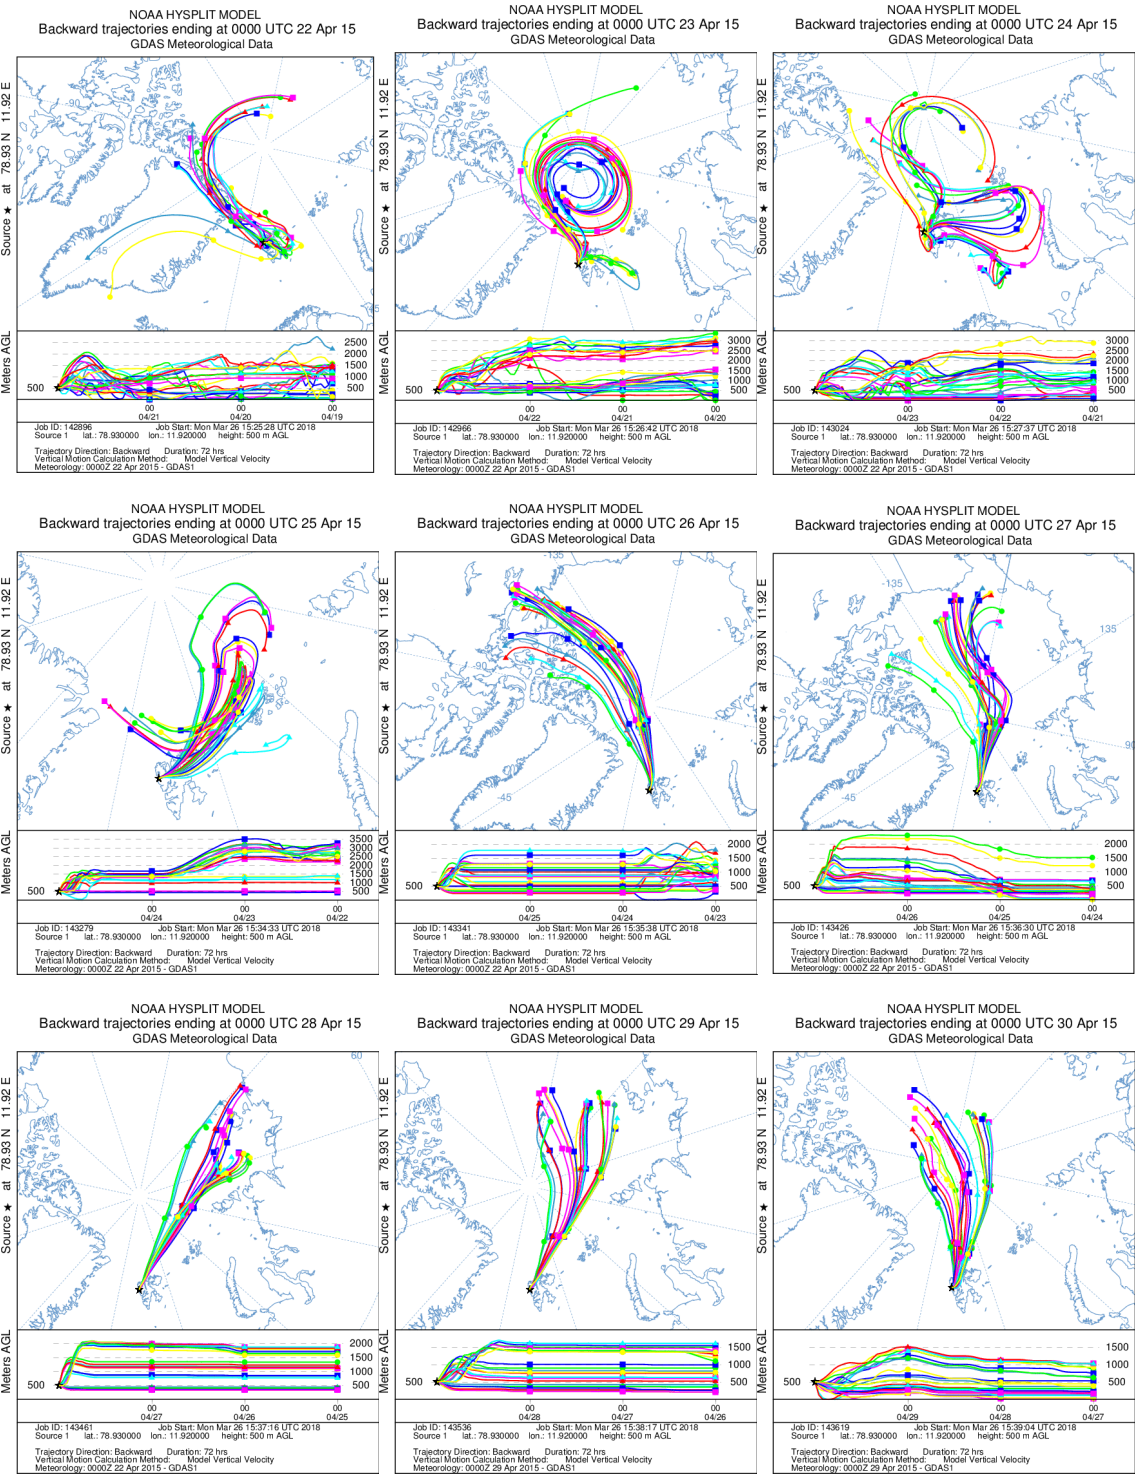

**Fig S3. Maps of troposphere BrO of northern hemisphere by GOME-2 product from 20 April to 13 May. (Cited from**

**[http://www.iup.uni-bremen.de/does/scia\\_data\\_browser.htm](http://www.iup.uni-bremen.de/does/scia_data_browser.htm)**)

BrO clouds existed at two main periods: coastal North America and Chukchi Sea during 22-23 April and North of Siberia during 08-11 May 2015. Both of the BrO clouds lasted about three to four days, the first of which was occasionally at the same period with the

5 Ny-Ålesund BrO enhancement event.

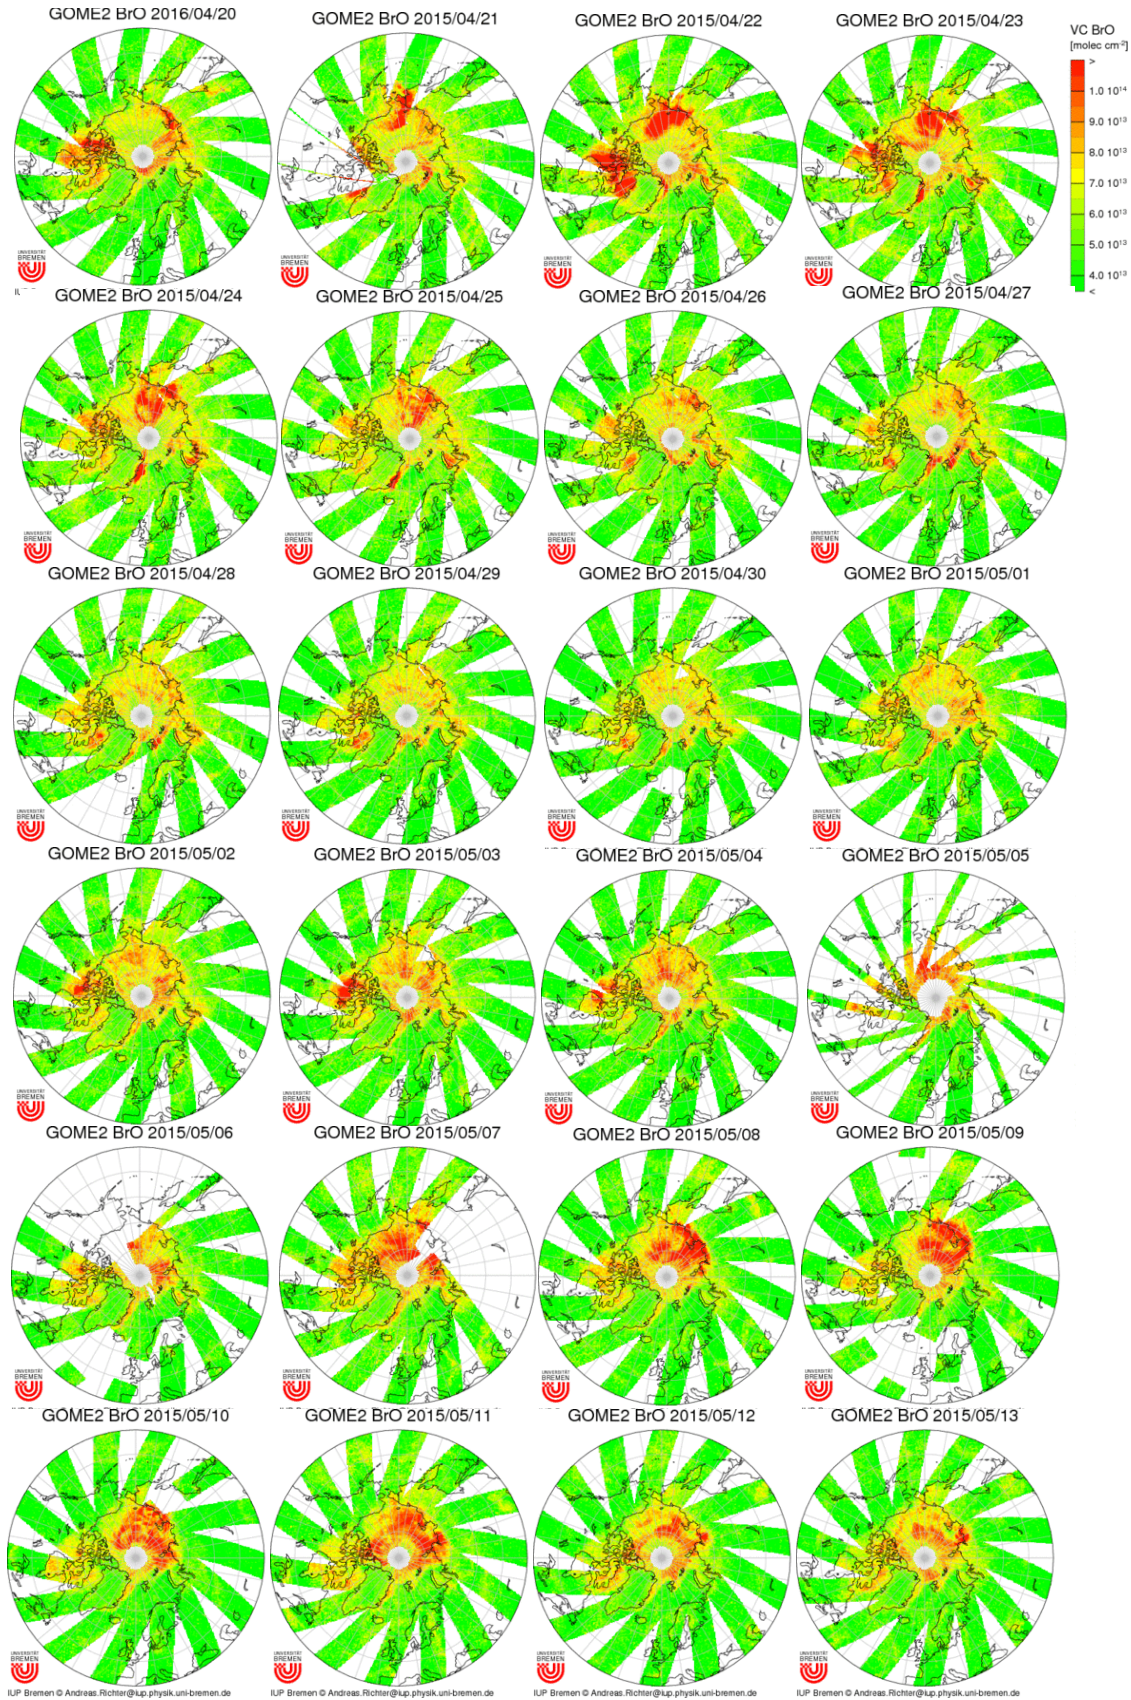

Supplement: Supplementary file 1 [file acp-18-9789-2018-supplement.pdf]
